# Supplementary material for: High-color-purity and high-efficiency non-doped deep-blue electroluminescent devices based on novel anthracene derivatives
Source: Royal Society of Chemistry journal article supplement (doi:10.1039/c2nj20809a), 2011-12-12
Supplement: c2nj20809a.pdf [file c2nj20809a.pdf]

### Calculated stereostructure and frontier orbitals of TBDNPA

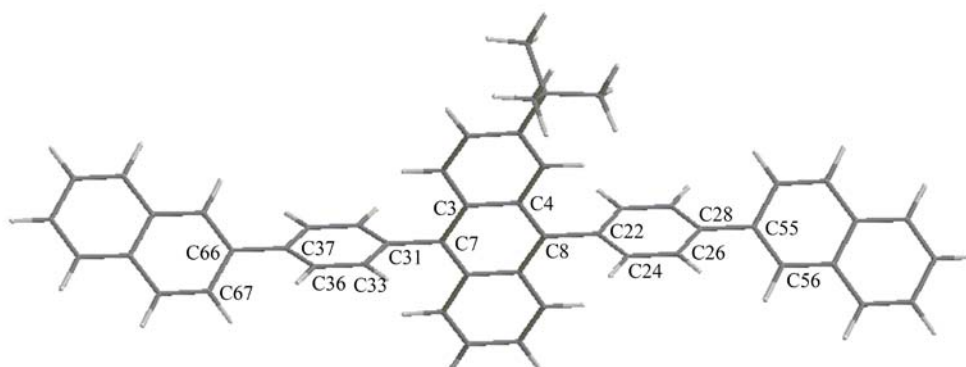

Dihedral angles:

$$C67-C66-C37-C36 = 37.2^\circ$$

$$C33-C31-C7-C3 = 77.5^\circ$$

$$C24-C22-C8-C4 = 78.4^\circ$$

$$C26-C28-C55-C56 = 37.3^\circ$$

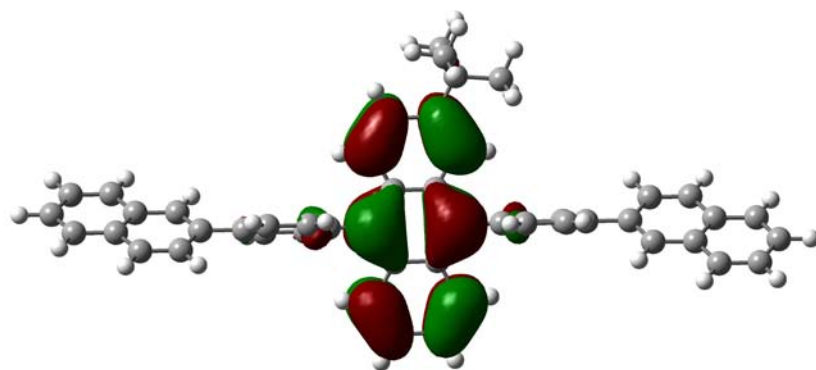

HOMO

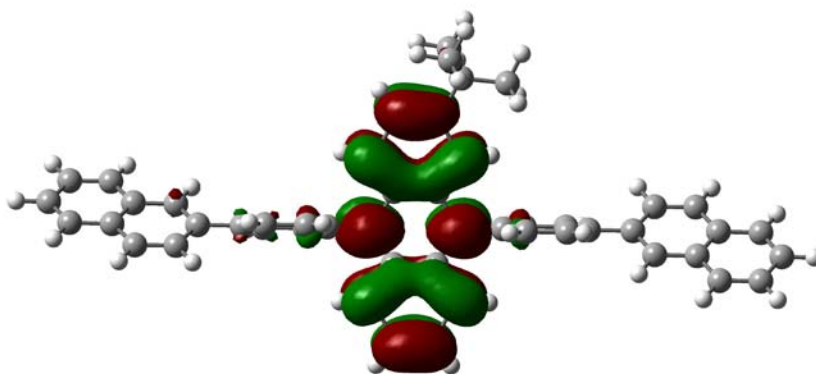

LUMO
